# Supplementary material
Source: PubMed Central journal article supplement (PMC3135181)
Supplement: Supp_Data.pdf [file Supp_Data.pdf]

## Supplementary Materials and Methods

### *Immunohistochemical analysis*

IMR90 fibroblasts (ATCC, Manassas, VA) were cultured on 0.1% gelatin-coated coverslips, and hESCs (Wicell H7 line) and iPSCs (from Thomson lab) on Matrigel-coated coverslips. Cells were fixed in 2% formaldehyde in PBS, permeabilized with 1% Triton-X-100 in PBS, and blocked with 5% bovine serum albumin in PBS. Cells were then labeled with each embryonic stem cell marker plus appropriate AlexaFluor secondary antibodies (Invitrogen) and DAPI (Vectorshield Laboratory, Burlingame, CA). Microscopy was performed using a Leica DM-IL inverted microscope (Leica Microsystems USA, Bannockburn, IL) and QImaging Retiga 2000R high-speed digital CCD camera (QImaging, Burnaby, BC, Canada). QCapture Pro 5.1 (QImaging, Burnaby, BC, Canada) was used for image acquisition.

### *Embryoid body formation*

Human embryoid body formation was accomplished by treating proliferating cells (iPSCs or hESCs) with collagenase IV and transferring them into suspension culture in differentiation media consisting of DMEM-F12 media (GIBCO) supplemented with 20% FBS, l-glutamine,  $\beta$ -mercaptoethanol, and nonessential amino acids. Embryoid bodies were maintained in suspension culture for 14 days, changing the media every 2 days.

### *Cell sample collection and RNA preparation*

Using the miRNeasy Mini Kit (Qiagen Inc., Valencia, CA), total RNA containing miRNA was isolated separately from biological duplicates of iPSC cells, ES cells, IMR90 fetal fibroblasts. In total, we prepared six distinct RNA samples for miRNA profiling. Total RNA concentration and purity were analyzed by spectrophotometry.

### *RT-PCR analysis of embryonic- and cardiac-specific transcriptions*

The expression of human embryonic cell markers (OCT4, NANOG, SOX2, REX1, DNMT3B, GDF3), as well as differentiation markers (Brachyury—mesoderm, AFP—endoderm, and NCAM1—neuroectoderm), was compared before across all three groups (in biological duplicates). 18S was used as housekeeping gene control. The primer sets used in the amplification reaction are as follows:

Human OCT4 forward primer: 5'-GGAAGGTATTCAG CCAAACGACCA-3'

Human OCT4 reverse primer: 5'-CTCACTCGGTTCTCG ATACTGGTT-3'

Human NANOG forward primer: 5'-ACCAGAACTGTG TTCTCTCCACC-3'

Human NANOG reverse primer: 5'-CCATTGCTA TTCTTCGGCCAGTTG-3'

Human SOX2 forward primer: 5'-GGGAAATGGGAGGG GTGCAAAAGAGG-3'

Human SOX2 reverse primer: 5'-TTGCGTGAGTGTGGA TGGGATTGGTG-3'

Human REX1-1 forward primer: 5'-GCGTACGCAAATT AAAGTCCAGA-3'

Human REX1 reverse primer: 5'-ATCCTAAACAGCT CGCAGAAT-3'

Human DNMT3B forward primer: 5'-TGCTGCTCCA GGGCCCGATACTTC-3'

Human DNMT3B reverse primer: 5'-TCCTTTTCGAGCTC AGTGCACCACAAAAC-3'

Human GDF3 forward primer: 5'-CTTATCTCGTAAA GGGCTGGG-3'

Human GDF3 reverse primer: 5'-GTGCCAACCCAGG TCCCCGAAGTT-3'

Human Brachyury forward primer: 5'-GCGGGAAAG AGCCTGCAGTA-3'

Human Brachyury reverse primer: 5'-TTCCCCGTTCA CGTACTTCC-3'

Human AFP forward primer: 5'-GCTGGATTGTCT GCAGGATGGGGAA-3'

Human AFP reverse primer: 5'-TCCCCTGAAGAAA ATTGGTTAAAAT-3'

Human NCAM1 forward primer: 5'-GCCAGGAGACAG AAACGAAG-3'

Human NCAM1 reverse primer: 5'-GGTGTGGAAAT GCTCTGGT-3'

Human 18S forward primer: 5'-ACACGGACAGGATT GACAGA-3'

Human 18S reverse primer: 5'-GGACATCTAAGGG CATCACAG-3'

### *MicroRNA microarray construction, hybridization, and scanning*

Microarray assay was performed using a service provider (LC Sciences, Houston, TX). The assay started with 4–8  $\mu$ g total RNA sample, which was size-fractionated using a YM-100 Microcon centrifugal filter (Millipore, Billerica, MA), and the small RNAs (<300 nt) isolated were 3'-extended with a poly(A) tail using poly(A) polymerase. An oligonucleotide tag was then ligated to the poly(A) tail for later fluorescent dye staining. Hybridization was performed overnight on a  $\mu$ ParaFlo microfluidic chip using a microcirculation pump (Atactic Technologies, Houston, TX) [1]. On the microfluidic chip, each detection probe consisted of a chemically modified nucleotide coding segment complementary to target microRNA (from miRBase, <http://microrna.sanger.ac.uk/sequences/>) or other control RNA, and a spacer segment of polyethylene glycol to extend the coding segment away from the substrate. The detection probes were made by in situ synthesis using photogenerated reagent chemistry. Hybridization used 100  $\mu$ L 6  $\times$  SSPE buffer (0.90 M NaCl, 60 mM Na<sub>2</sub>HPO<sub>4</sub>, 6 mM EDTA, pH 6.8) containing 25% formamide at 34°C. After RNA hybridization, tag-conjugating Cy3 or Cy5 dyes were circulated through the microfluidic chip for dye staining. Fluorescence images were collected using a laser scanner (GenePix 4000B, Molecular Devices, Sunnyvale, CA) and digitized using Array-Pro image analysis software (Media Cybernetics, Bethesda, MD).

### *MicroRNA microarray normalization and data analysis*

Microarray normalization removes system-related variations, such as sample amount variations, different labeling dyes, and signal gain differences of scanners so that

biological variations can be faithfully revealed. Data were analyzed by first subtracting the background and then normalizing the signals using a LOWESS filter (locally weighted regression) [2]. Background is determined using a regression-based background mapping method. The regression is performed on 5% to 25% of the lowest intensity data points excluding blank spots. Raw data matrix is then subtracted by the background matrix. Data adjustment includes data filtering, Log<sub>2</sub> transformation, and gene centering, and normalization. The data filtering removes miRNAs with normalized intensity values below a threshold value of 32 across all samples. Gene centering and normalization transform the Log<sub>2</sub> values using the mean and the standard deviation of individual genes across all samples. *t* Values are calculated for each miRNA between groups, and *P* values are computed from the theoretical *t*-distribution. miRNAs with *P* values below a critical *P*-value (typically 0.01) are selected for cluster analysis. The clustering was done using hierarchical methods, with average linkage and Euclidean distance metrics [3]. The clustering plot was generated using TIGR MeV (Multiple Experimental Viewer) software from The Institute for Genomic Research. Principal component analysis was performed using the *R* statistical package (cran.r-project.org) (Fig. 3A,B). For Figure 3A, in order to accurately represent the distances between samples in principal component space, the loading of the samples along each principal component was scaled (multiplied) by the standard deviation along that component.

### *Quantitative RT-PCR*

For mRNA qRT-PCR, 2 µg of total RNA from each sample was reverse transcribed with SuperScript III (Invitrogen). For each sample, qRT-PCR was performed in triplicate on an

ABI 7900HT instrument (Applied Biosystems) using Taqman primer probe sets (Applied Biosystems) for each gene of interest and a GAPDH endogenous control primer probe set for normalization. Representative results are shown as fold expression relative to undifferentiated hESCs unless otherwise stated. Error bars reflect one standard deviation from the mean of three technical replicates unless otherwise stated. miRNA qRT-PCR was performed with miRNA Taqman Expression Assays (Applied Biosystems) and the miRNA Reverse Transcription kit (Applied Biosystems). For each miRNA analyzed, 10 ng of total RNA was reverse transcribed with a miRNA-specific primer. RNU48 was used as the endogenous control. Results are shown as fold expression relative to undifferentiated hESCs unless otherwise noted. Error bars indicate one standard deviation from the mean of three technical replicates unless otherwise stated.

### *Statistical analysis*

All results are expressed as mean ± SD. The Student's *t*-test was used, and *P* values of <0.05 were considered to indicate significant differences between two groups.

### **Supplementary References**

1. Gao X, E Gulari and X Zhou. (2004). In situ synthesis of oligonucleotide microarrays. *Biopolymers* 73:579–596.
2. Bolstad BM, RA Irizarry, M Astrand and TP Speed. (2003). A comparison of normalization methods for high density oligonucleotide array data based on variance and bias. *Bioinformatics* 19:185–193.
3. Eisen MB, PT Spellman, PO Brown and D Botstein. (1998). Cluster analysis and display of genome-wide expression patterns. *Proc Natl Acad Sci USA* 95:14863–14868.



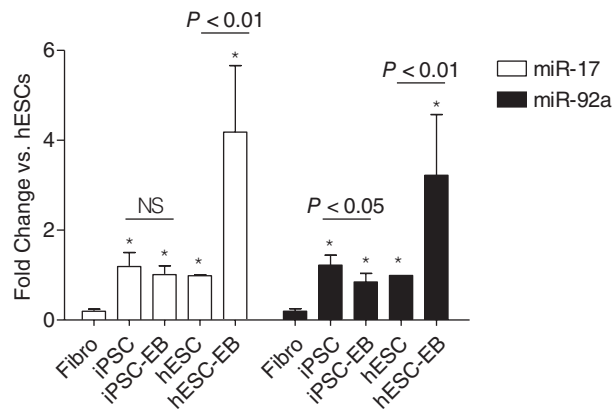

**SUPPLEMENTARY FIG. 2.** Quantitative RT-PCR analysis of miR-17 and miR-92a during differentiation of iPSCs and hESCs. These two miRNAs showed different expression trends in the two pluripotent cell types after differentiation to Day 14 embryoid bodies. Each was significantly up-regulated in hESC-embryoid bodies but not in differentiated iPSCs. Error bars indicate one standard deviation from the mean of two biological replicate experiments.

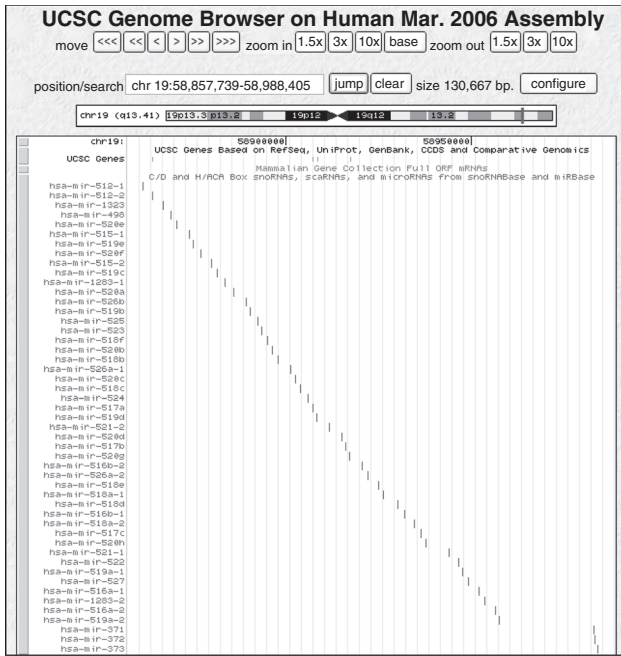

**SUPPLEMENTARY FIG. 3.** UC Santa Cruz genome browser screenshot of clustered miRNAs on chromosome 19 that exhibit differential expression between iPSCs and hESCs.

SUPPLEMENTARY TABLE 1. COMPLETE NORMALIZED INTENSITY VALUES FOR miRNAs ACROSS ALL SAMPLES

| No. | Reporter name   | <i>iPSC-1</i>          | <i>iPSC-2</i>          | <i>Fibro-1</i>         | <i>Fibro-2</i>         | <i>hESC-1</i>          | <i>hESC-2</i>          |
|-----|-----------------|------------------------|------------------------|------------------------|------------------------|------------------------|------------------------|
|     |                 | <i>Averaged signal</i> |
| 1   | hsa-let-7a      | 836                    | 395                    | 10,127                 | 10,384                 | 116                    | 48                     |
| 2   | hsa-let-7a*     | 3                      | 2                      | 13                     | 6                      | 2                      | 1                      |
| 3   | hsa-let-7b      | 204                    | 32                     | 3,093                  | 3,028                  | 73                     | 3                      |
| 4   | hsa-let-7b*     | 4                      | 3                      | 25                     | 23                     | 5                      | 4                      |
| 5   | hsa-let-7c      | 450                    | 62                     | 5,944                  | 6,469                  | 89                     | 3                      |
| 6   | hsa-let-7c*     | 4                      | 3                      | 8                      | 12                     | 2                      | 1                      |
| 7   | hsa-let-7d      | 285                    | 83                     | 7,675                  | 7,818                  | 56                     | 7                      |
| 8   | hsa-let-7d*     | 5                      | 3                      | 76                     | 83                     | 2                      | 2                      |
| 9   | hsa-let-7e      | 149                    | 107                    | 4,629                  | 4,473                  | 25                     | 16                     |
| 10  | hsa-let-7e*     | 2                      | 2                      | 20                     | 12                     | 2                      | 2                      |
| 11  | hsa-let-7f      | 352                    | 100                    | 9,108                  | 9,468                  | 15                     | 5                      |
| 12  | hsa-let-7f-1*   | 3                      | 4                      | 11                     | 12                     | 4                      | 3                      |
| 13  | hsa-let-7f-2*   | 0                      | 2                      | 8                      | 5                      | 1                      | 0                      |
| 14  | hsa-let-7g      | 62                     | 35                     | 2,803                  | 3,173                  | 5                      | 2                      |
| 15  | hsa-let-7g*     | 4                      | 3                      | 12                     | 11                     | 2                      | 2                      |
| 16  | hsa-let-7i      | 136                    | 52                     | 5,351                  | 5,459                  | 29                     | 4                      |
| 17  | hsa-let-7i*     | 2                      | 2                      | 15                     | 8                      | 2                      | 1                      |
| 18  | hsa-miR-1       | 2,651                  | 206                    | 4                      | 3                      | 21                     | 0                      |
| 19  | hsa-miR-100     | 62                     | 41                     | 12,267                 | 11,138                 | 6                      | 5                      |
| 20  | hsa-miR-100*    | 4                      | 2                      | 10                     | 16                     | 2                      | 2                      |
| 21  | hsa-miR-101     | 31                     | 41                     | 10                     | 6                      | 166                    | 52                     |
| 22  | hsa-miR-101*    | 3                      | 3                      | 8                      | 10                     | 2                      | 1                      |
| 23  | hsa-miR-103     | 1,685                  | 1,316                  | 733                    | 669                    | 5,221                  | 2,391                  |
| 24  | hsa-miR-105     | 7                      | 7                      | 17                     | 11                     | 2                      | 3                      |
| 25  | hsa-miR-105*    | 2                      | 2                      | 6                      | 6                      | 1                      | 1                      |
| 26  | hsa-miR-106a    | 14,967                 | 12,779                 | 653                    | 672                    | 15,936                 | 10,658                 |
| 27  | hsa-miR-106a*   | 15                     | 18                     | 10                     | 8                      | 9                      | 16                     |
| 28  | hsa-miR-106b    | 2,856                  | 2,630                  | 577                    | 519                    | 4,233                  | 3,187                  |
| 29  | hsa-miR-106b*   | 24                     | 32                     | 18                     | 14                     | 61                     | 46                     |
| 30  | hsa-miR-107     | 1,458                  | 1,157                  | 685                    | 618                    | 4,790                  | 2,143                  |
| 31  | hsa-miR-10a     | 4                      | 3                      | 839                    | 1,084                  | 3                      | 1                      |
| 32  | hsa-miR-10a*    | 3                      | 3                      | 23                     | 24                     | 2                      | 1                      |
| 33  | hsa-miR-10b     | 14                     | 17                     | 61                     | 175                    | 5                      | 2                      |
| 34  | hsa-miR-10b*    | 3                      | 4                      | 11                     | 11                     | 2                      | 1                      |
| 35  | hsa-miR-122     | 224                    | 49                     | 9                      | 2                      | 241                    | 4                      |
| 36  | hsa-miR-122*    | 3                      | 3                      | 10                     | 11                     | 1                      | 0                      |
| 37  | hsa-miR-124     | 28                     | 30                     | 20                     | 12                     | 112                    | 50                     |
| 38  | hsa-miR-124*    | 2                      | 2                      | 11                     | 13                     | 2                      | 1                      |
| 39  | hsa-miR-125a-3p | 5                      | 7                      | 21                     | 22                     | 5                      | 5                      |
| 40  | hsa-miR-125a-5p | 1,158                  | 1,261                  | 2,082                  | 2,379                  | 232                    | 526                    |
| 41  | hsa-miR-125b    | 1,831                  | 1,301                  | 19,511                 | 18,034                 | 48                     | 40                     |
| 42  | hsa-miR-125b-1* | 1                      | 2                      | 22                     | 19                     | 1                      | 0                      |
| 43  | hsa-miR-125b-2* | 3                      | 4                      | 11                     | 14                     | 1                      | 1                      |
| 44  | hsa-miR-126     | 239                    | 93                     | 11                     | 9                      | 33                     | 53                     |
| 45  | hsa-miR-126*    | 3                      | 2                      | 5                      | 8                      | 2                      | 1                      |
| 46  | hsa-miR-127-3p  | 3                      | 3                      | 707                    | 800                    | 4                      | 1                      |
| 47  | hsa-miR-127-5p  | 2                      | 2                      | 10                     | 10                     | 2                      | 1                      |
| 48  | hsa-miR-129*    | 4                      | 3                      | 7                      | 7                      | 2                      | 0                      |
| 49  | hsa-miR-129-3p  | 11                     | 9                      | 4                      | 8                      | 4                      | 4                      |
| 50  | hsa-miR-129-5p  | 5                      | 6                      | 14                     | 10                     | 4                      | 3                      |
| 51  | hsa-miR-130a    | 729                    | 647                    | 166                    | 155                    | 2,196                  | 574                    |
| 52  | hsa-miR-130a*   | 1                      | 3                      | 5                      | 10                     | 1                      | 1                      |
| 53  | hsa-miR-130b    | 310                    | 271                    | 126                    | 116                    | 849                    | 266                    |
| 54  | hsa-miR-130b*   | 17                     | 38                     | 6                      | 7                      | 5                      | 13                     |
| 55  | hsa-miR-132     | 19                     | 24                     | 137                    | 148                    | 17                     | 26                     |
| 56  | hsa-miR-132*    | 1                      | 3                      | 12                     | 5                      | 1                      | 0                      |

(Continued)

SUPPLEMENTARY TABLE 1. COMPLETE NORMALIZED INTENSITY VALUES FOR miRNAs ACROSS ALL SAMPLES (Continued)

| No. | Reporter name   | <i>iPSC-1</i>          | <i>iPSC-2</i>          | <i>Fibro-1</i>         | <i>Fibro-2</i>         | <i>hESC-1</i>          | <i>hESC-2</i>          |
|-----|-----------------|------------------------|------------------------|------------------------|------------------------|------------------------|------------------------|
|     |                 | <i>Averaged signal</i> |
| 57  | hsa-miR-133a    | 120                    | 24                     | 8                      | 10                     | 39                     | 4                      |
| 58  | hsa-miR-133b    | 102                    | 20                     | 6                      | 5                      | 27                     | 3                      |
| 59  | hsa-miR-134     | 5                      | 4                      | 334                    | 386                    | 1                      | 3                      |
| 60  | hsa-miR-135a    | 4                      | 3                      | 5                      | 6                      | 0                      | 3                      |
| 61  | hsa-miR-135a*   | 2                      | 2                      | 11                     | 8                      | 2                      | 1                      |
| 62  | hsa-miR-135b    | 4                      | 3                      | 6                      | 4                      | 1                      | 3                      |
| 63  | hsa-miR-135b*   | 5                      | 6                      | 8                      | 6                      | 3                      | 3                      |
| 64  | hsa-miR-136     | 1                      | 1                      | 8                      | 5                      | 1                      | 0                      |
| 65  | hsa-miR-136*    | 1                      | 2                      | 7                      | 14                     | 0                      | 0                      |
| 66  | hsa-miR-137     | 4                      | 8                      | 17                     | 19                     | 1                      | 0                      |
| 67  | hsa-miR-138     | 10                     | 10                     | 11                     | 10                     | 13                     | 6                      |
| 68  | hsa-miR-138-1*  | 3                      | 4                      | 5                      | 14                     | 3                      | 2                      |
| 69  | hsa-miR-138-2*  | 2                      | 2                      | 2                      | 6                      | 1                      | 1                      |
| 70  | hsa-miR-139-3p  | 2                      | 3                      | 3                      | 7                      | 1                      | 1                      |
| 71  | hsa-miR-139-5p  | 7                      | 4                      | 5                      | 11                     | 2                      | 2                      |
| 72  | hsa-miR-140-3p  | 31                     | 32                     | 37                     | 31                     | 136                    | 43                     |
| 73  | hsa-miR-140-5p  | 2                      | 2                      | 3                      | 6                      | 1                      | 1                      |
| 74  | hsa-miR-141     | 14                     | 8                      | 3                      | 6                      | 19                     | 8                      |
| 75  | hsa-miR-141*    | 1                      | 3                      | 5                      | 12                     | 0                      | 0                      |
| 76  | hsa-miR-142-3p  | 1                      | 2                      | 1                      | 10                     | 0                      | 0                      |
| 77  | hsa-miR-142-5p  | 1                      | 3                      | 2                      | 11                     | 0                      | 0                      |
| 78  | hsa-miR-143     | 141                    | 120                    | 6,094                  | 6,024                  | 24                     | 6                      |
| 79  | hsa-miR-143*    | 3                      | 3                      | 6                      | 10                     | 2                      | 2                      |
| 80  | hsa-miR-144     | 2                      | 3                      | 3                      | 9                      | 2                      | 3                      |
| 81  | hsa-miR-144*    | 2                      | 2                      | 6                      | 5                      | 2                      | 1                      |
| 82  | hsa-miR-145     | 174                    | 115                    | 5,299                  | 4,835                  | 72                     | 21                     |
| 83  | hsa-miR-145*    | 8                      | 8                      | 100                    | 114                    | 2                      | 2                      |
| 84  | hsa-miR-146a    | 48                     | 46                     | 8                      | 6                      | 21                     | 83                     |
| 85  | hsa-miR-146a*   | 2                      | 2                      | 8                      | 8                      | 1                      | 3                      |
| 86  | hsa-miR-146b-3p | 3                      | 3                      | 9                      | 13                     | 1                      | 3                      |
| 87  | hsa-miR-146b-5p | 6                      | 6                      | 28                     | 37                     | 2                      | 4                      |
| 88  | hsa-miR-147     | 3                      | 3                      | 11                     | 5                      | 2                      | 3                      |
| 89  | hsa-miR-147b    | 1                      | 3                      | 6                      | 11                     | 1                      | 3                      |
| 90  | hsa-miR-148a    | 680                    | 851                    | 8                      | 6                      | 129                    | 236                    |
| 91  | hsa-miR-148a*   | 2                      | 4                      | 7                      | 7                      | 2                      | 4                      |
| 92  | hsa-miR-148b    | 60                     | 92                     | 41                     | 55                     | 60                     | 117                    |
| 93  | hsa-miR-148b*   | 3                      | 4                      | 5                      | 10                     | 2                      | 4                      |
| 94  | hsa-miR-149     | 9                      | 10                     | 21                     | 18                     | 6                      | 16                     |
| 95  | hsa-miR-149*    | 410                    | 532                    | 98                     | 64                     | 326                    | 486                    |
| 96  | hsa-miR-150     | 18                     | 12                     | 10                     | 8                      | 6                      | 5                      |
| 97  | hsa-miR-150*    | 14                     | 24                     | 21                     | 13                     | 5                      | 13                     |
| 98  | hsa-miR-151-3p  | 399                    | 372                    | 427                    | 358                    | 491                    | 499                    |
| 99  | hsa-miR-151-5p  | 2,464                  | 3,103                  | 1,205                  | 1,175                  | 2,236                  | 2,637                  |
| 100 | hsa-miR-152     | 28                     | 23                     | 436                    | 523                    | 2                      | 8                      |
| 101 | hsa-miR-153     | 3                      | 5                      | 8                      | 5                      | 1                      | 3                      |
| 102 | hsa-miR-154     | 4                      | 3                      | 54                     | 57                     | 1                      | 3                      |
| 103 | hsa-miR-154*    | 3                      | 3                      | 15                     | 20                     | 1                      | 1                      |
| 104 | hsa-miR-155     | 178                    | 255                    | 3,569                  | 4,126                  | 84                     | 287                    |
| 105 | hsa-miR-155*    | 3                      | 3                      | 9                      | 11                     | 1                      | 2                      |
| 106 | hsa-miR-15a     | 49                     | 99                     | 104                    | 150                    | 156                    | 100                    |
| 107 | hsa-miR-15a*    | 3                      | 3                      | 7                      | 11                     | 2                      | 2                      |
| 108 | hsa-miR-15b     | 5,403                  | 6,606                  | 2,062                  | 2,302                  | 2,519                  | 4,549                  |
| 109 | hsa-miR-15b*    | 6                      | 16                     | 4                      | 10                     | 3                      | 11                     |
| 110 | hsa-miR-16      | 4,934                  | 4,985                  | 3,672                  | 4,046                  | 5,735                  | 4,438                  |
| 111 | hsa-miR-16-1*   | 2                      | 3                      | 2                      | 7                      | 1                      | 3                      |
| 112 | hsa-miR-16-2*   | 24                     | 34                     | 10                     | 15                     | 3                      | 18                     |

SUPPLEMENTARY TABLE 1. COMPLETE NORMALIZED INTENSITY VALUES FOR miRNAs ACROSS ALL SAMPLES (Continued)

| No. | Reporter name   | <i>iPSC-1</i>          | <i>iPSC-2</i>          | <i>Fibro-1</i>         | <i>Fibro-2</i>         | <i>hESC-1</i>          | <i>hESC-2</i>          |
|-----|-----------------|------------------------|------------------------|------------------------|------------------------|------------------------|------------------------|
|     |                 | <i>Averaged signal</i> |
| 113 | hsa-miR-17      | 15,196                 | 13,396                 | 761                    | 762                    | 17,035                 | 10,968                 |
| 114 | hsa-miR-17*     | 10                     | 11                     | 14                     | 9                      | 23                     | 10                     |
| 115 | hsa-miR-181a    | 84                     | 65                     | 753                    | 651                    | 368                    | 154                    |
| 116 | hsa-miR-181a*   | 3                      | 4                      | 13                     | 14                     | 2                      | 2                      |
| 117 | hsa-miR-181a-2* | 10                     | 10                     | 28                     | 35                     | 11                     | 21                     |
| 118 | hsa-miR-181b    | 27                     | 31                     | 172                    | 256                    | 54                     | 67                     |
| 119 | hsa-miR-181c    | 12                     | 7                      | 14                     | 33                     | 16                     | 20                     |
| 120 | hsa-miR-181c*   | 3                      | 4                      | 5                      | 10                     | 0                      | 3                      |
| 121 | hsa-miR-181d    | 12                     | 13                     | 45                     | 53                     | 7                      | 15                     |
| 122 | hsa-miR-182     | 1,125                  | 1,958                  | 8                      | 4                      | 2,963                  | 5,119                  |
| 123 | hsa-miR-182*    | 2                      | 3                      | 3                      | 4                      | 2                      | 3                      |
| 124 | hsa-miR-183     | 519                    | 873                    | 7                      | 7                      | 1,367                  | 2,697                  |
| 125 | hsa-miR-183*    | 23                     | 33                     | 4                      | 2                      | 38                     | 97                     |
| 126 | hsa-miR-184     | 13                     | 18                     | 5                      | 6                      | 7                      | 14                     |
| 127 | hsa-miR-185     | 174                    | 205                    | 253                    | 239                    | 231                    | 199                    |
| 128 | hsa-miR-185*    | 3                      | 3                      | 5                      | 10                     | 2                      | 3                      |
| 129 | hsa-miR-186     | 71                     | 50                     | 20                     | 29                     | 276                    | 94                     |
| 130 | hsa-miR-186*    | 3                      | 4                      | 8                      | 11                     | 4                      | 3                      |
| 131 | hsa-miR-187     | 204                    | 249                    | 6                      | 9                      | 353                    | 328                    |
| 132 | hsa-miR-187*    | 7                      | 12                     | 7                      | 11                     | 8                      | 9                      |
| 133 | hsa-miR-188-3p  | 3                      | 3                      | 4                      | 6                      | 2                      | 3                      |
| 134 | hsa-miR-188-5p  | 7                      | 12                     | 13                     | 13                     | 3                      | 6                      |
| 135 | hsa-miR-18a     | 1,718                  | 1,733                  | 166                    | 162                    | 2,230                  | 2,086                  |
| 136 | hsa-miR-18a*    | 5                      | 8                      | 13                     | 6                      | 4                      | 5                      |
| 137 | hsa-miR-18b     | 922                    | 1,008                  | 51                     | 48                     | 1,064                  | 1,006                  |
| 138 | hsa-miR-18b*    | 4                      | 5                      | 13                     | 11                     | 3                      | 3                      |
| 139 | hsa-miR-190     | 2                      | 3                      | 4                      | 5                      | 1                      | 3                      |
| 140 | hsa-miR-190b    | 2                      | 3                      | 4                      | 9                      | 1                      | 2                      |
| 141 | hsa-miR-191     | 2,326                  | 1,704                  | 1,279                  | 1,124                  | 3,054                  | 2,148                  |
| 142 | hsa-miR-191*    | 9                      | 11                     | 24                     | 15                     | 6                      | 8                      |
| 143 | hsa-miR-192     | 92                     | 49                     | 17                     | 14                     | 31                     | 41                     |
| 144 | hsa-miR-192*    | 3                      | 4                      | 7                      | 6                      | 1                      | 3                      |
| 145 | hsa-miR-193a-3p | 4                      | 4                      | 6                      | 11                     | 4                      | 3                      |
| 146 | hsa-miR-193a-5p | 41                     | 49                     | 191                    | 178                    | 76                     | 85                     |
| 147 | hsa-miR-193b    | 7                      | 6                      | 7                      | 16                     | 2                      | 2                      |
| 148 | hsa-miR-193b*   | 19                     | 25                     | 21                     | 23                     | 7                      | 12                     |
| 149 | hsa-miR-194     | 62                     | 45                     | 12                     | 12                     | 15                     | 31                     |
| 150 | hsa-miR-194*    | 4                      | 4                      | 9                      | 10                     | 3                      | 4                      |
| 151 | hsa-miR-195     | 134                    | 158                    | 26                     | 28                     | 46                     | 83                     |
| 152 | hsa-miR-195*    | 4                      | 4                      | 12                     | 8                      | 3                      | 2                      |
| 153 | hsa-miR-196a    | 5                      | 5                      | 3                      | 6                      | 1                      | 2                      |
| 154 | hsa-miR-196a*   | 2                      | 3                      | 5                      | 9                      | 1                      | 1                      |
| 155 | hsa-miR-196b    | 4                      | 4                      | 7                      | 8                      | 0                      | 1                      |
| 156 | hsa-miR-197     | 177                    | 200                    | 139                    | 134                    | 113                    | 146                    |
| 157 | hsa-miR-198     | 18                     | 31                     | 16                     | 13                     | 3                      | 8                      |
| 158 | hsa-miR-199a-3p | 510                    | 480                    | 4,779                  | 5,122                  | 19                     | 26                     |
| 159 | hsa-miR-199a-5p | 20                     | 15                     | 404                    | 310                    | 3                      | 2                      |
| 160 | hsa-miR-199b-5p | 3                      | 3                      | 15                     | 11                     | 2                      | 2                      |
| 161 | hsa-miR-19a     | 391                    | 415                    | 15                     | 13                     | 1,523                  | 423                    |
| 162 | hsa-miR-19a*    | 3                      | 4                      | 8                      | 7                      | 3                      | 1                      |
| 163 | hsa-miR-19b     | 4,309                  | 3,822                  | 353                    | 287                    | 10,863                 | 4,771                  |
| 164 | hsa-miR-19b-1*  | 4                      | 3                      | 10                     | 11                     | 1                      | 3                      |
| 165 | hsa-miR-19b-2*  | 2                      | 3                      | 9                      | 8                      | 2                      | 1                      |
| 166 | hsa-miR-200a    | 6                      | 5                      | 6                      | 8                      | 1                      | 2                      |
| 167 | hsa-miR-200a*   | 4                      | 3                      | 9                      | 12                     | 1                      | 2                      |
| 168 | hsa-miR-200b    | 69                     | 107                    | 9                      | 5                      | 2                      | 13                     |

(Continued)



SUPPLEMENTARY TABLE 1. COMPLETE NORMALIZED INTENSITY VALUES FOR miRNAs ACROSS ALL SAMPLES (Continued)

| No. | Reporter name    | <i>iPSC-1</i>          | <i>iPSC-2</i>          | <i>Fibro-1</i>         | <i>Fibro-2</i>         | <i>hESC-1</i>          | <i>hESC-2</i>          |
|-----|------------------|------------------------|------------------------|------------------------|------------------------|------------------------|------------------------|
|     |                  | <i>Averaged signal</i> |
| 169 | hsa-miR-200b*    | 5                      | 7                      | 11                     | 7                      | 2                      | 3                      |
| 170 | hsa-miR-200c     | 695                    | 1,027                  | 6                      | 6                      | 604                    | 1,122                  |
| 171 | hsa-miR-200c*    | 3                      | 3                      | 8                      | 12                     | 1                      | 2                      |
| 172 | hsa-miR-202      | 3                      | 4                      | 12                     | 9                      | 2                      | 3                      |
| 173 | hsa-miR-202*     | 3                      | 2                      | 4                      | 3                      | 1                      | 1                      |
| 174 | hsa-miR-203      | 9                      | 14                     | 7                      | 6                      | 2                      | 3                      |
| 175 | hsa-miR-204      | 117                    | 227                    | 5                      | 5                      | 3                      | 12                     |
| 176 | hsa-miR-205      | 680                    | 761                    | 10                     | 5                      | 1,002                  | 685                    |
| 177 | hsa-miR-206      | 4                      | 4                      | 11                     | 11                     | 2                      | 3                      |
| 178 | hsa-miR-208b     | 2                      | 3                      | 6                      | 5                      | 2                      | 1                      |
| 179 | hsa-miR-20a      | 16,938                 | 13,597                 | 940                    | 1,042                  | 16,350                 | 11,967                 |
| 180 | hsa-miR-20a*     | 11                     | 11                     | 5                      | 6                      | 2                      | 9                      |
| 181 | hsa-miR-20b      | 10,694                 | 9,250                  | 118                    | 176                    | 10,423                 | 8,584                  |
| 182 | hsa-miR-20b*     | 37                     | 37                     | 10                     | 10                     | 48                     | 39                     |
| 183 | hsa-miR-21       | 26,212                 | 18,315                 | 56,501                 | 41,374                 | 6,629                  | 11,549                 |
| 184 | hsa-miR-21*      | 3                      | 4                      | 8                      | 10                     | 2                      | 2                      |
| 185 | hsa-miR-210      | 6                      | 8                      | 86                     | 72                     | 42                     | 14                     |
| 186 | hsa-miR-211      | 3                      | 3                      | 7                      | 7                      | 1                      | 3                      |
| 187 | hsa-miR-212      | 6                      | 6                      | 22                     | 26                     | 4                      | 4                      |
| 188 | hsa-miR-214      | 321                    | 313                    | 3,270                  | 3,144                  | 22                     | 20                     |
| 189 | hsa-miR-214*     | 2                      | 3                      | 6                      | 13                     | 1                      | 1                      |
| 190 | hsa-miR-215      | 4                      | 4                      | 11                     | 8                      | 2                      | 2                      |
| 191 | hsa-miR-216a     | 4                      | 4                      | 7                      | 7                      | 2                      | 3                      |
| 192 | hsa-miR-216b     | 3                      | 4                      | 9                      | 7                      | 1                      | 1                      |
| 193 | hsa-miR-217      | 4                      | 5                      | 8                      | 13                     | 2                      | 1                      |
| 194 | hsa-miR-218      | 6                      | 11                     | 10                     | 10                     | 2                      | 6                      |
| 195 | hsa-miR-218-1*   | 3                      | 3                      | 4                      | 6                      | 1                      | 2                      |
| 196 | hsa-miR-218-2*   | 3                      | 3                      | 14                     | 8                      | 1                      | 3                      |
| 197 | hsa-miR-219-1-3p | 1                      | 3                      | 5                      | 7                      | 1                      | 2                      |
| 198 | hsa-miR-219-2-3p | 3                      | 3                      | 6                      | 6                      | 12                     | 25                     |
| 199 | hsa-miR-219-5p   | 2                      | 3                      | 2                      | 6                      | 1                      | 1                      |
| 200 | hsa-miR-22       | 143                    | 108                    | 2,057                  | 1,689                  | 192                    | 63                     |
| 201 | hsa-miR-22*      | 15                     | 15                     | 46                     | 68                     | 3                      | 4                      |
| 202 | hsa-miR-220b     | 3                      | 4                      | 4                      | 8                      | 0                      | 1                      |
| 203 | hsa-miR-220c     | 3                      | 3                      | 3                      | 9                      | 2                      | 1                      |
| 204 | hsa-miR-221      | 3,546                  | 2,821                  | 5,758                  | 5,968                  | 3,820                  | 2,454                  |
| 205 | hsa-miR-221*     | 43                     | 57                     | 29                     | 33                     | 3                      | 15                     |
| 206 | hsa-miR-222      | 4,620                  | 2,887                  | 9,330                  | 8,231                  | 4,225                  | 2,983                  |
| 207 | hsa-miR-222*     | 11                     | 11                     | 29                     | 20                     | 37                     | 36                     |
| 208 | hsa-miR-223      | 4                      | 4                      | 6                      | 7                      | 3                      | 3                      |
| 209 | hsa-miR-223*     | 3                      | 3                      | 2                      | 10                     | 2                      | 2                      |
| 210 | hsa-miR-224      | 12                     | 17                     | 17                     | 17                     | 3                      | 10                     |
| 211 | hsa-miR-23a      | 5,716                  | 4,065                  | 18,077                 | 16,793                 | 1,480                  | 1,806                  |
| 212 | hsa-miR-23a*     | 13                     | 19                     | 91                     | 78                     | 6                      | 7                      |
| 213 | hsa-miR-23b      | 4,349                  | 3,244                  | 13,591                 | 13,980                 | 1,275                  | 1,458                  |
| 214 | hsa-miR-23b*     | 4                      | 5                      | 15                     | 15                     | 3                      | 3                      |
| 215 | hsa-miR-24       | 1,742                  | 1,718                  | 5,552                  | 5,839                  | 742                    | 627                    |
| 216 | hsa-miR-24-1*    | 3                      | 3                      | 11                     | 8                      | 2                      | 2                      |
| 217 | hsa-miR-24-2*    | 11                     | 10                     | 57                     | 48                     | 4                      | 5                      |
| 218 | hsa-miR-25       | 9,086                  | 11,524                 | 950                    | 1,061                  | 7,262                  | 9,888                  |
| 219 | hsa-miR-25*      | 33                     | 44                     | 30                     | 20                     | 72                     | 52                     |
| 220 | hsa-miR-26a      | 8,392                  | 7,052                  | 9,903                  | 10,346                 | 3,614                  | 4,738                  |
| 221 | hsa-miR-26a-1*   | 4                      | 3                      | 10                     | 8                      | 2                      | 2                      |
| 222 | hsa-miR-26a-2*   | 5                      | 6                      | 5                      | 12                     | 3                      | 2                      |
| 223 | hsa-miR-26b      | 282                    | 460                    | 571                    | 970                    | 65                     | 155                    |
| 224 | hsa-miR-26b*     | 4                      | 3                      | 8                      | 12                     | 3                      | 3                      |

SUPPLEMENTARY TABLE 1. COMPLETE NORMALIZED INTENSITY VALUES FOR miRNAs ACROSS ALL SAMPLES (Continued)

| No. | Reporter name  | <i>iPSC-1</i>          | <i>iPSC-2</i>          | <i>Fibro-1</i>         | <i>Fibro-2</i>         | <i>hESC-1</i>          | <i>hESC-2</i>          |
|-----|----------------|------------------------|------------------------|------------------------|------------------------|------------------------|------------------------|
|     |                | <i>Averaged signal</i> |
| 225 | hsa-miR-27a    | 964                    | 1,088                  | 3,077                  | 3,712                  | 213                    | 178                    |
| 226 | hsa-miR-27a*   | 3                      | 4                      | 10                     | 9                      | 2                      | 2                      |
| 227 | hsa-miR-27b    | 814                    | 891                    | 2,179                  | 2,941                  | 155                    | 236                    |
| 228 | hsa-miR-27b*   | 7                      | 10                     | 26                     | 40                     | 5                      | 8                      |
| 229 | hsa-miR-28-3p  | 173                    | 206                    | 66                     | 80                     | 48                     | 99                     |
| 230 | hsa-miR-28-5p  | 327                    | 534                    | 166                    | 202                    | 170                    | 153                    |
| 231 | hsa-miR-296-3p | 9                      | 13                     | 13                     | 10                     | 4                      | 3                      |
| 232 | hsa-miR-296-5p | 11                     | 9                      | 14                     | 11                     | 10                     | 4                      |
| 233 | hsa-miR-297    | 4                      | 3                      | 2                      | 10                     | 3                      | 2                      |
| 234 | hsa-miR-298    | 4                      | 4                      | 6                      | 11                     | 3                      | 3                      |
| 235 | hsa-miR-299-3p | 3                      | 3                      | 12                     | 20                     | 2                      | 1                      |
| 236 | hsa-miR-299-5p | 4                      | 4                      | 137                    | 164                    | 3                      | 4                      |
| 237 | hsa-miR-29a    | 1,548                  | 1,425                  | 15,311                 | 14,506                 | 219                    | 306                    |
| 238 | hsa-miR-29a*   | 2                      | 2                      | 10                     | 9                      | 2                      | 2                      |
| 239 | hsa-miR-29b    | 6                      | 5                      | 89                     | 135                    | 5                      | 1                      |
| 240 | hsa-miR-29b-1* | 9                      | 19                     | 80                     | 90                     | 2                      | 3                      |
| 241 | hsa-miR-29b-2* | 3                      | 4                      | 9                      | 8                      | 2                      | 2                      |
| 242 | hsa-miR-29c    | 27                     | 36                     | 232                    | 894                    | 3                      | 6                      |
| 243 | hsa-miR-29c*   | 4                      | 4                      | 12                     | 8                      | 2                      | 3                      |
| 244 | hsa-miR-300    | 4                      | 3                      | 11                     | 8                      | 1                      | 3                      |
| 245 | hsa-miR-301a   | 80                     | 69                     | 21                     | 20                     | 103                    | 52                     |
| 246 | hsa-miR-301b   | 4                      | 5                      | 9                      | 7                      | 4                      | 4                      |
| 247 | hsa-miR-302a   | 22,408                 | 25,043                 | 3                      | 3                      | 21,816                 | 23,669                 |
| 248 | hsa-miR-302a*  | 18,353                 | 20,273                 | 7                      | 2                      | 19,663                 | 20,451                 |
| 249 | hsa-miR-302b   | 35,612                 | 41,582                 | 4                      | 3                      | 38,063                 | 40,644                 |
| 250 | hsa-miR-302b*  | 542                    | 674                    | 1                      | 5                      | 986                    | 687                    |
| 251 | hsa-miR-302c   | 10,344                 | 12,474                 | 3                      | 6                      | 6,469                  | 10,205                 |
| 252 | hsa-miR-302c*  | 2,386                  | 3,577                  | 4                      | 6                      | 4,068                  | 4,421                  |
| 253 | hsa-miR-302d   | 27,548                 | 30,744                 | 2                      | 7                      | 34,836                 | 32,876                 |
| 254 | hsa-miR-302d*  | 741                    | 949                    | 2                      | 5                      | 1,026                  | 1,680                  |
| 255 | hsa-miR-30a    | 199                    | 244                    | 288                    | 310                    | 151                    | 172                    |
| 256 | hsa-miR-30a*   | 21                     | 29                     | 24                     | 33                     | 4                      | 12                     |
| 257 | hsa-miR-30b    | 943                    | 911                    | 379                    | 468                    | 384                    | 514                    |
| 258 | hsa-miR-30b*   | 6                      | 6                      | 7                      | 18                     | 4                      | 4                      |
| 259 | hsa-miR-30c    | 2,335                  | 2,138                  | 459                    | 605                    | 1,192                  | 2,185                  |
| 260 | hsa-miR-30c-1* | 6                      | 7                      | 5                      | 10                     | 2                      | 4                      |
| 261 | hsa-miR-30c-2* | 6                      | 5                      | 7                      | 12                     | 3                      | 5                      |
| 262 | hsa-miR-30d    | 253                    | 265                    | 525                    | 507                    | 184                    | 201                    |
| 263 | hsa-miR-30d*   | 3                      | 4                      | 3                      | 8                      | 1                      | 2                      |
| 264 | hsa-miR-30e    | 206                    | 220                    | 60                     | 78                     | 153                    | 147                    |
| 265 | hsa-miR-30e*   | 34                     | 60                     | 7                      | 10                     | 3                      | 15                     |
| 266 | hsa-miR-31     | 249                    | 234                    | 3,064                  | 3,107                  | 703                    | 247                    |
| 267 | hsa-miR-31*    | 2                      | 3                      | 11                     | 12                     | 3                      | 2                      |
| 268 | hsa-miR-32     | 1                      | 3                      | 3                      | 9                      | 1                      | 1                      |
| 269 | hsa-miR-32*    | 2                      | 5                      | 2                      | 5                      | 2                      | 2                      |
| 270 | hsa-miR-323-3p | 2                      | 4                      | 23                     | 41                     | 1                      | 2                      |
| 271 | hsa-miR-323-5p | 5                      | 3                      | 12                     | 9                      | 2                      | 2                      |
| 272 | hsa-miR-324-3p | 7                      | 6                      | 14                     | 16                     | 4                      | 6                      |
| 273 | hsa-miR-324-5p | 13                     | 13                     | 35                     | 37                     | 61                     | 22                     |
| 274 | hsa-miR-325    | 2                      | 5                      | 2                      | 12                     | 1                      | 2                      |
| 275 | hsa-miR-326    | 4                      | 4                      | 6                      | 13                     | 3                      | 5                      |
| 276 | hsa-miR-328    | 3                      | 4                      | 23                     | 23                     | 3                      | 4                      |
| 277 | hsa-miR-329    | 8                      | 5                      | 173                    | 232                    | 0                      | 2                      |
| 278 | hsa-miR-330-3p | 13                     | 18                     | 10                     | 12                     | 12                     | 11                     |
| 279 | hsa-miR-330-5p | 2                      | 4                      | 2                      | 11                     | 2                      | 2                      |
| 280 | hsa-miR-331-3p | 52                     | 52                     | 42                     | 39                     | 294                    | 120                    |

(Continued)

SUPPLEMENTARY TABLE 1. COMPLETE NORMALIZED INTENSITY VALUES FOR miRNAs ACROSS ALL SAMPLES (Continued)

| No. | Reporter name  | <i>iPSC-1</i>          | <i>iPSC-2</i>          | <i>Fibro-1</i>         | <i>Fibro-2</i>         | <i>hESC-1</i>          | <i>hESC-2</i>          |
|-----|----------------|------------------------|------------------------|------------------------|------------------------|------------------------|------------------------|
|     |                | <i>Averaged signal</i> |
| 281 | hsa-miR-331-5p | 4                      | 4                      | 4                      | 11                     | 3                      | 2                      |
| 282 | hsa-miR-335    | 234                    | 601                    | 13                     | 36                     | 46                     | 211                    |
| 283 | hsa-miR-335*   | 37                     | 115                    | 10                     | 11                     | 7                      | 37                     |
| 284 | hsa-miR-337-3p | 1                      | 4                      | 33                     | 97                     | 2                      | 3                      |
| 285 | hsa-miR-337-5p | 3                      | 6                      | 59                     | 60                     | 1                      | 1                      |
| 286 | hsa-miR-338-3p | 4                      | 4                      | 2                      | 11                     | 1                      | 1                      |
| 287 | hsa-miR-338-5p | 4                      | 5                      | 5                      | 7                      | 1                      | 2                      |
| 288 | hsa-miR-339-3p | 6                      | 8                      | 16                     | 15                     | 5                      | 3                      |
| 289 | hsa-miR-339-5p | 6                      | 5                      | 16                     | 13                     | 3                      | 5                      |
| 290 | hsa-miR-33a    | 7                      | 5                      | 9                      | 5                      | 1                      | 1                      |
| 291 | hsa-miR-33a*   | 5                      | 5                      | 5                      | 10                     | 2                      | 2                      |
| 292 | hsa-miR-33b    | 6                      | 5                      | 5                      | 12                     | 1                      | 1                      |
| 293 | hsa-miR-33b*   | 7                      | 7                      | 15                     | 10                     | 2                      | 4                      |
| 294 | hsa-miR-340    | 80                     | 186                    | 8                      | 7                      | 40                     | 129                    |
| 295 | hsa-miR-340*   | 20                     | 30                     | 10                     | 10                     | 2                      | 15                     |
| 296 | hsa-miR-342-3p | 261                    | 328                    | 135                    | 124                    | 38                     | 122                    |
| 297 | hsa-miR-342-5p | 16                     | 24                     | 20                     | 14                     | 5                      | 15                     |
| 298 | hsa-miR-345    | 12                     | 11                     | 23                     | 21                     | 51                     | 19                     |
| 299 | hsa-miR-346    | 6                      | 5                      | 12                     | 13                     | 2                      | 3                      |
| 300 | hsa-miR-34a    | 124                    | 156                    | 233                    | 192                    | 69                     | 31                     |
| 301 | hsa-miR-34a*   | 9                      | 9                      | 13                     | 10                     | 3                      | 3                      |
| 302 | hsa-miR-34b    | 22                     | 22                     | 4                      | 9                      | 2                      | 2                      |
| 303 | hsa-miR-34b*   | 5                      | 5                      | 5                      | 10                     | 2                      | 3                      |
| 304 | hsa-miR-34c-3p | 15                     | 16                     | 6,950                  | 2,337                  | 610                    | 611                    |
| 305 | hsa-miR-34c-5p | 6                      | 8                      | 10                     | 9                      | 4                      | 3                      |
| 306 | hsa-miR-361-3p | 11                     | 11                     | 11                     | 11                     | 2                      | 4                      |
| 307 | hsa-miR-361-5p | 1,205                  | 1,559                  | 651                    | 689                    | 482                    | 792                    |
| 308 | hsa-miR-362-3p | 9                      | 7                      | 14                     | 11                     | 8                      | 7                      |
| 309 | hsa-miR-362-5p | 9                      | 10                     | 9                      | 16                     | 13                     | 8                      |
| 310 | hsa-miR-363    | 1,545                  | 1,451                  | 4                      | 6                      | 2,113                  | 1,611                  |
| 311 | hsa-miR-363*   | 26                     | 27                     | 4                      | 7                      | 46                     | 66                     |
| 312 | hsa-miR-365    | 80                     | 113                    | 33                     | 62                     | 2                      | 7                      |
| 313 | hsa-miR-367    | 239                    | 261                    | 2                      | 9                      | 1,803                  | 254                    |
| 314 | hsa-miR-367*   | 4                      | 4                      | 5                      | 5                      | 2                      | 2                      |
| 315 | hsa-miR-369-3p | 4                      | 4                      | 18                     | 10                     | 2                      | 2                      |
| 316 | hsa-miR-369-5p | 2                      | 2                      | 11                     | 16                     | 3                      | 2                      |
| 317 | hsa-miR-370    | 2                      | 3                      | 34                     | 30                     | 2                      | 4                      |
| 318 | hsa-miR-371-3p | 1                      | 3                      | 5                      | 7                      | 2                      | 7                      |
| 319 | hsa-miR-371-5p | 25                     | 19                     | 14                     | 11                     | 239                    | 231                    |
| 320 | hsa-miR-372    | 7                      | 6                      | 8                      | 9                      | 214                    | 105                    |
| 321 | hsa-miR-373    | 30                     | 17                     | 9                      | 4                      | 205                    | 269                    |
| 322 | hsa-miR-373*   | 8                      | 4                      | 14                     | 12                     | 13                     | 20                     |
| 323 | hsa-miR-374a   | 73                     | 186                    | 17                     | 12                     | 9                      | 280                    |
| 324 | hsa-miR-374a*  | 2                      | 2                      | 4                      | 8                      | 1                      | 2                      |
| 325 | hsa-miR-374b   | 550                    | 1,156                  | 14                     | 24                     | 561                    | 2,030                  |
| 326 | hsa-miR-374b*  | 5                      | 6                      | 4                      | 6                      | 2                      | 13                     |
| 327 | hsa-miR-375    | 215                    | 133                    | 4                      | 4                      | 28                     | 128                    |
| 328 | hsa-miR-376a   | 4                      | 2                      | 133                    | 225                    | 2                      | 3                      |
| 329 | hsa-miR-376a*  | 1                      | 4                      | 34                     | 34                     | 1                      | 3                      |
| 330 | hsa-miR-376b   | 1                      | 3                      | 15                     | 12                     | 2                      | 4                      |
| 331 | hsa-miR-376c   | 3                      | 5                      | 639                    | 713                    | 3                      | 6                      |
| 332 | hsa-miR-377    | 21                     | 16                     | 49                     | 71                     | 16                     | 28                     |
| 333 | hsa-miR-377*   | 1                      | 4                      | 13                     | 7                      | 2                      | 3                      |
| 334 | hsa-miR-378    | 45                     | 34                     | 9                      | 10                     | 297                    | 119                    |
| 335 | hsa-miR-378*   | 6                      | 5                      | 11                     | 8                      | 9                      | 9                      |
| 336 | hsa-miR-379    | 5                      | 5                      | 459                    | 523                    | 2                      | 3                      |

SUPPLEMENTARY TABLE 1. COMPLETE NORMALIZED INTENSITY VALUES FOR miRNAs ACROSS ALL SAMPLES (Continued)

| No. | Reporter name   | <i>iPSC-1</i>          | <i>iPSC-2</i>          | <i>Fibro-1</i>         | <i>Fibro-2</i>         | <i>hESC-1</i>          | <i>hESC-2</i>          |
|-----|-----------------|------------------------|------------------------|------------------------|------------------------|------------------------|------------------------|
|     |                 | <i>Averaged signal</i> |
| 337 | hsa-miR-379*    | 4                      | 4                      | 19                     | 42                     | 1                      | 2                      |
| 338 | hsa-miR-380     | 5                      | 2                      | 10                     | 9                      | 1                      | 1                      |
| 339 | hsa-miR-380*    | 4                      | 3                      | 12                     | 9                      | 2                      | 3                      |
| 340 | hsa-miR-381     | 6                      | 3                      | 26                     | 29                     | 2                      | 3                      |
| 341 | hsa-miR-382     | 4                      | 5                      | 505                    | 607                    | 1                      | 3                      |
| 342 | hsa-miR-383     | 2                      | 4                      | 7                      | 10                     | 12                     | 3                      |
| 343 | hsa-miR-384     | 2                      | 4                      | 8                      | 8                      | 1                      | 3                      |
| 344 | hsa-miR-409-3p  | 4                      | 5                      | 34                     | 37                     | 3                      | 3                      |
| 345 | hsa-miR-409-5p  | 1                      | 4                      | 19                     | 16                     | 2                      | 3                      |
| 346 | hsa-miR-410     | 1                      | 3                      | 23                     | 14                     | 2                      | 3                      |
| 347 | hsa-miR-411     | 2                      | 3                      | 62                     | 53                     | 1                      | 2                      |
| 348 | hsa-miR-411*    | 4                      | 3                      | 62                     | 68                     | 2                      | 3                      |
| 349 | hsa-miR-412     | 2                      | 3                      | 4                      | 10                     | 2                      | 3                      |
| 350 | hsa-miR-421     | 324                    | 384                    | 36                     | 46                     | 696                    | 1,077                  |
| 351 | hsa-miR-422a    | 5                      | 4                      | 7                      | 7                      | 9                      | 8                      |
| 352 | hsa-miR-423-3p  | 6                      | 5                      | 13                     | 8                      | 3                      | 4                      |
| 353 | hsa-miR-423-5p  | 946                    | 1,316                  | 878                    | 844                    | 1,095                  | 1,231                  |
| 354 | hsa-miR-424     | 961                    | 1,059                  | 755                    | 1,129                  | 1,245                  | 1,610                  |
| 355 | hsa-miR-424*    | 76                     | 108                    | 158                    | 158                    | 76                     | 126                    |
| 356 | hsa-miR-425     | 308                    | 239                    | 190                    | 156                    | 662                    | 423                    |
| 357 | hsa-miR-425*    | 7                      | 8                      | 19                     | 14                     | 12                     | 9                      |
| 358 | hsa-miR-429     | 5                      | 5                      | 5                      | 8                      | 0                      | 3                      |
| 359 | hsa-miR-431     | 2                      | 3                      | 41                     | 49                     | 1                      | 3                      |
| 360 | hsa-miR-431*    | 3                      | 3                      | 5                      | 6                      | 2                      | 2                      |
| 361 | hsa-miR-432     | 3                      | 4                      | 526                    | 574                    | 1                      | 2                      |
| 362 | hsa-miR-432*    | 1                      | 2                      | 11                     | 14                     | 1                      | 4                      |
| 363 | hsa-miR-433     | 2                      | 2                      | 107                    | 138                    | 2                      | 5                      |
| 364 | hsa-miR-448     | 4                      | 4                      | 11                     | 12                     | 4                      | 21                     |
| 365 | hsa-miR-449a    | 4                      | 2                      | 10                     | 13                     | 2                      | 3                      |
| 366 | hsa-miR-449b    | 4                      | 2                      | 11                     | 11                     | 1                      | 3                      |
| 367 | hsa-miR-450a    | 3                      | 4                      | 14                     | 19                     | 2                      | 6                      |
| 368 | hsa-miR-450b-3p | 2                      | 2                      | 11                     | 13                     | 2                      | 4                      |
| 369 | hsa-miR-450b-5p | 3                      | 1                      | 7                      | 14                     | 2                      | 2                      |
| 370 | hsa-miR-451     | 38                     | 5                      | 12                     | 12                     | 2                      | 3                      |
| 371 | hsa-miR-452     | 4                      | 4                      | 11                     | 14                     | 1                      | 6                      |
| 372 | hsa-miR-452*    | 3                      | 3                      | 10                     | 13                     | 1                      | 4                      |
| 373 | hsa-miR-453     | 3                      | 3                      | 9                      | 16                     | 2                      | 3                      |
| 374 | hsa-miR-454     | 263                    | 609                    | 54                     | 70                     | 37                     | 154                    |
| 375 | hsa-miR-454*    | 5                      | 6                      | 15                     | 18                     | 1                      | 5                      |
| 376 | hsa-miR-455-3p  | 206                    | 186                    | 232                    | 203                    | 598                    | 292                    |
| 377 | hsa-miR-455-5p  | 8                      | 11                     | 17                     | 18                     | 6                      | 9                      |
| 378 | hsa-miR-483-3p  | 5                      | 5                      | 12                     | 13                     | 2                      | 3                      |
| 379 | hsa-miR-483-5p  | 111                    | 250                    | 39                     | 29                     | 38                     | 138                    |
| 380 | hsa-miR-484     | 80                     | 83                     | 171                    | 132                    | 157                    | 131                    |
| 381 | hsa-miR-485-3p  | 7                      | 4                      | 150                    | 140                    | 2                      | 5                      |
| 382 | hsa-miR-485-5p  | 4                      | 3                      | 34                     | 33                     | 2                      | 4                      |
| 383 | hsa-miR-486-3p  | 10                     | 9                      | 13                     | 15                     | 5                      | 7                      |
| 384 | hsa-miR-486-5p  | 96                     | 85                     | 13                     | 12                     | 21                     | 31                     |
| 385 | hsa-miR-487a    | 5                      | 3                      | 64                     | 83                     | 2                      | 2                      |
| 386 | hsa-miR-487b    | 6                      | 4                      | 707                    | 725                    | 2                      | 4                      |
| 387 | hsa-miR-488     | 5                      | 5                      | 10                     | 13                     | 1                      | 3                      |
| 388 | hsa-miR-488*    | 4                      | 4                      | 11                     | 11                     | 1                      | 4                      |
| 389 | hsa-miR-489     | 33                     | 32                     | 11                     | 11                     | 59                     | 89                     |
| 390 | hsa-miR-490-3p  | 4                      | 4                      | 12                     | 19                     | 1                      | 4                      |
| 391 | hsa-miR-490-5p  | 4                      | 4                      | 53                     | 58                     | 2                      | 3                      |
| 392 | hsa-miR-491-3p  | 7                      | 4                      | 5                      | 12                     | 3                      | 6                      |

(Continued)

SUPPLEMENTARY TABLE 1. COMPLETE NORMALIZED INTENSITY VALUES FOR miRNAs ACROSS ALL SAMPLES (Continued)

| No. | Reporter name    | <i>iPSC-1</i>          | <i>iPSC-2</i>          | <i>Fibro-1</i>         | <i>Fibro-2</i>         | <i>hESC-1</i>          | <i>hESC-2</i>          |
|-----|------------------|------------------------|------------------------|------------------------|------------------------|------------------------|------------------------|
|     |                  | <i>Averaged signal</i> |
| 393 | hsa-miR-491-5p   | 7                      | 5                      | 9                      | 11                     | 8                      | 5                      |
| 394 | hsa-miR-492      | 6                      | 6                      | 7                      | 12                     | 3                      | 4                      |
| 395 | hsa-miR-493      | 5                      | 4                      | 41                     | 47                     | 3                      | 3                      |
| 396 | hsa-miR-493*     | 4                      | 3                      | 98                     | 177                    | 2                      | 1                      |
| 397 | hsa-miR-494      | 6                      | 7                      | 815                    | 771                    | 2                      | 4                      |
| 398 | hsa-miR-495      | 7                      | 5                      | 583                    | 628                    | 2                      | 3                      |
| 399 | hsa-miR-496      | 4                      | 3                      | 16                     | 10                     | 2                      | 3                      |
| 400 | hsa-miR-497      | 5                      | 4                      | 13                     | 13                     | 5                      | 4                      |
| 401 | hsa-miR-497*     | 4                      | 5                      | 12                     | 11                     | 2                      | 3                      |
| 402 | hsa-miR-498      | 46                     | 35                     | 12                     | 11                     | 126                    | 182                    |
| 403 | hsa-miR-499-3p   | 5                      | 3                      | 7                      | 12                     | 2                      | 3                      |
| 404 | hsa-miR-499-5p   | 5                      | 5                      | 5                      | 7                      | 2                      | 3                      |
| 405 | hsa-miR-500      | 9                      | 10                     | 9                      | 12                     | 5                      | 9                      |
| 406 | hsa-miR-500*     | 10                     | 9                      | 13                     | 13                     | 18                     | 15                     |
| 407 | hsa-miR-501-3p   | 4                      | 3                      | 11                     | 11                     | 3                      | 4                      |
| 408 | hsa-miR-501-5p   | 7                      | 10                     | 12                     | 11                     | 7                      | 11                     |
| 409 | hsa-miR-502-3p   | 8                      | 6                      | 13                     | 14                     | 12                     | 9                      |
| 410 | hsa-miR-502-5p   | 3                      | 6                      | 15                     | 8                      | 4                      | 4                      |
| 411 | hsa-miR-503      | 163                    | 285                    | 187                    | 149                    | 310                    | 343                    |
| 412 | hsa-miR-504      | 10                     | 10                     | 13                     | 10                     | 23                     | 23                     |
| 413 | hsa-miR-505      | 52                     | 59                     | 8                      | 11                     | 41                     | 76                     |
| 414 | hsa-miR-505*     | 87                     | 142                    | 24                     | 25                     | 78                     | 134                    |
| 415 | hsa-miR-506      | 2                      | 2                      | 17                     | 11                     | 1                      | 1                      |
| 416 | hsa-miR-507      | 2                      | 3                      | 10                     | 5                      | 1                      | 1                      |
| 417 | hsa-miR-508-3p   | 2                      | 4                      | 11                     | 10                     | 1                      | 0                      |
| 418 | hsa-miR-508-5p   | 2                      | 2                      | 18                     | 13                     | 1                      | 2                      |
| 419 | hsa-miR-509-3-5p | 3                      | 4                      | 12                     | 11                     | 2                      | 2                      |
| 420 | hsa-miR-509-3p   | 3                      | 3                      | 14                     | 5                      | 3                      | 4                      |
| 421 | hsa-miR-509-5p   | 3                      | 3                      | 19                     | 14                     | 5                      | 5                      |
| 422 | hsa-miR-510      | 4                      | 3                      | 18                     | 15                     | 4                      | 4                      |
| 423 | hsa-miR-511      | 2                      | 2                      | 12                     | 9                      | 2                      | 1                      |
| 424 | hsa-miR-512-3p   | 42                     | 34                     | 13                     | 6                      | 938                    | 437                    |
| 425 | hsa-miR-512-5p   | 5                      | 3                      | 19                     | 5                      | 82                     | 27                     |
| 426 | hsa-miR-514      | 5                      | 4                      | 11                     | 5                      | 2                      | 1                      |
| 427 | hsa-miR-515-3p   | 3                      | 4                      | 10                     | 6                      | 3                      | 3                      |
| 428 | hsa-miR-515-5p   | 10                     | 11                     | 10                     | 9                      | 80                     | 151                    |
| 429 | hsa-miR-516a-3p  | 3                      | 3                      | 9                      | 12                     | 1                      | 4                      |
| 430 | hsa-miR-516a-5p  | 10                     | 8                      | 7                      | 5                      | 73                     | 55                     |
| 431 | hsa-miR-516b     | 29                     | 36                     | 6                      | 4                      | 313                    | 249                    |
| 432 | hsa-miR-517*     | 3                      | 4                      | 51                     | 5                      | 10                     | 9                      |
| 433 | hsa-miR-517a     | 87                     | 71                     | 8                      | 4                      | 528                    | 656                    |
| 434 | hsa-miR-517b     | 152                    | 114                    | 11                     | 3                      | 598                    | 800                    |
| 435 | hsa-miR-517c     | 4                      | 3                      | 7                      | 4                      | 9                      | 18                     |
| 436 | hsa-miR-518a-3p  | 3                      | 2                      | 10                     | 7                      | 1                      | 1                      |
| 437 | hsa-miR-518a-5p  | 2                      | 3                      | 6                      | 9                      | 4                      | 3                      |
| 438 | hsa-miR-518b     | 21                     | 15                     | 11                     | 6                      | 99                     | 92                     |
| 439 | hsa-miR-518c     | 3                      | 3                      | 11                     | 14                     | 3                      | 3                      |
| 440 | hsa-miR-518c*    | 5                      | 4                      | 16                     | 11                     | 21                     | 21                     |
| 441 | hsa-miR-518d-3p  | 3                      | 3                      | 16                     | 13                     | 2                      | 3                      |
| 442 | hsa-miR-518d-5p  | 23                     | 25                     | 15                     | 10                     | 299                    | 206                    |
| 443 | hsa-miR-518e     | 5                      | 3                      | 17                     | 12                     | 8                      | 12                     |
| 444 | hsa-miR-518e*    | 8                      | 8                      | 16                     | 10                     | 63                     | 70                     |
| 445 | hsa-miR-518f     | 11                     | 12                     | 16                     | 10                     | 42                     | 51                     |
| 446 | hsa-miR-518f*    | 17                     | 23                     | 17                     | 12                     | 297                    | 200                    |
| 447 | hsa-miR-519a     | 2                      | 3                      | 14                     | 12                     | 21                     | 12                     |
| 448 | hsa-miR-519b-3p  | 2                      | 3                      | 14                     | 12                     | 13                     | 9                      |

SUPPLEMENTARY TABLE 1. COMPLETE NORMALIZED INTENSITY VALUES FOR miRNAs ACROSS ALL SAMPLES (Continued)

| No. | Reporter name   | <i>iPSC-1</i>          | <i>iPSC-2</i>          | <i>Fibro-1</i>         | <i>Fibro-2</i>         | <i>hESC-1</i>          | <i>hESC-2</i>          |
|-----|-----------------|------------------------|------------------------|------------------------|------------------------|------------------------|------------------------|
|     |                 | <i>Averaged signal</i> |
| 449 | hsa-miR-519c-3p | 4                      | 3                      | 11                     | 10                     | 34                     | 22                     |
| 450 | hsa-miR-519d    | 9                      | 7                      | 21                     | 5                      | 25                     | 34                     |
| 451 | hsa-miR-519e    | 3                      | 1                      | 12                     | 11                     | 2                      | 3                      |
| 452 | hsa-miR-519e*   | 5                      | 5                      | 19                     | 10                     | 95                     | 33                     |
| 453 | hsa-miR-520a-3p | 3                      | 2                      | 13                     | 11                     | 5                      | 6                      |
| 454 | hsa-miR-520a-5p | 6                      | 5                      | 11                     | 10                     | 125                    | 49                     |
| 455 | hsa-miR-520b    | 4                      | 4                      | 13                     | 11                     | 28                     | 22                     |
| 456 | hsa-miR-520c-3p | 5                      | 2                      | 14                     | 8                      | 68                     | 33                     |
| 457 | hsa-miR-520d-3p | 5                      | 2                      | 10                     | 8                      | 3                      | 7                      |
| 458 | hsa-miR-520d-5p | 3                      | 2                      | 12                     | 12                     | 23                     | 9                      |
| 459 | hsa-miR-520e    | 4                      | 4                      | 7                      | 11                     | 4                      | 4                      |
| 460 | hsa-miR-520f    | 7                      | 6                      | 10                     | 10                     | 54                     | 45                     |
| 461 | hsa-miR-520g    | 24                     | 17                     | 9                      | 8                      | 101                    | 177                    |
| 462 | hsa-miR-520h    | 33                     | 17                     | 10                     | 12                     | 121                    | 203                    |
| 463 | hsa-miR-521     | 3                      | 2                      | 9                      | 11                     | 3                      | 2                      |
| 464 | hsa-miR-522     | 15                     | 14                     | 9                      | 10                     | 27                     | 105                    |
| 465 | hsa-miR-523     | 1                      | 2                      | 9                      | 12                     | 2                      | 3                      |
| 466 | hsa-miR-524-3p  | 2                      | 4                      | 15                     | 10                     | 12                     | 8                      |
| 467 | hsa-miR-524-5p  | 5                      | 5                      | 16                     | 12                     | 31                     | 17                     |
| 468 | hsa-miR-525-3p  | 3                      | 5                      | 16                     | 11                     | 2                      | 3                      |
| 469 | hsa-miR-525-5p  | 17                     | 11                     | 4                      | 6                      | 223                    | 90                     |
| 470 | hsa-miR-526b    | 8                      | 11                     | 8                      | 4                      | 16                     | 48                     |
| 471 | hsa-miR-526b*   | 3                      | 5                      | 9                      | 4                      | 4                      | 9                      |
| 472 | hsa-miR-532-3p  | 11                     | 7                      | 10                     | 13                     | 3                      | 8                      |
| 473 | hsa-miR-532-5p  | 16                     | 13                     | 19                     | 18                     | 34                     | 23                     |
| 474 | hsa-miR-539     | 3                      | 5                      | 49                     | 49                     | 2                      | 3                      |
| 475 | hsa-miR-541     | 2                      | 4                      | 15                     | 10                     | 2                      | 2                      |
| 476 | hsa-miR-541*    | 4                      | 4                      | 14                     | 11                     | 1                      | 3                      |
| 477 | hsa-miR-542-3p  | 1                      | 4                      | 7                      | 7                      | 1                      | 5                      |
| 478 | hsa-miR-542-5p  | 3                      | 3                      | 10                     | 5                      | 2                      | 2                      |
| 479 | hsa-miR-543     | 2                      | 3                      | 61                     | 55                     | 1                      | 2                      |
| 480 | hsa-miR-544     | 1                      | 4                      | 8                      | 4                      | 1                      | 1                      |
| 481 | hsa-miR-545     | 2                      | 3                      | 5                      | 5                      | 1                      | 3                      |
| 482 | hsa-miR-545*    | 1                      | 3                      | 6                      | 4                      | 1                      | 2                      |
| 483 | hsa-miR-548a-3p | 1                      | 4                      | 4                      | 5                      | 1                      | 3                      |
| 484 | hsa-miR-548a-5p | 1                      | 3                      | 9                      | 7                      | 2                      | 3                      |
| 485 | hsa-miR-548b-3p | 3                      | 4                      | 6                      | 4                      | 1                      | 2                      |
| 486 | hsa-miR-548b-5p | 3                      | 3                      | 9                      | 4                      | 1                      | 1                      |
| 487 | hsa-miR-548c-3p | 2                      | 3                      | 5                      | 8                      | 2                      | 2                      |
| 488 | hsa-miR-548c-5p | 3                      | 3                      | 9                      | 6                      | 1                      | 3                      |
| 489 | hsa-miR-548d-3p | 2                      | 3                      | 2                      | 4                      | 1                      | 3                      |
| 490 | hsa-miR-548d-5p | 2                      | 3                      | 8                      | 6                      | 1                      | 2                      |
| 491 | hsa-miR-549     | 3                      | 1                      | 6                      | 8                      | 1                      | 2                      |
| 492 | hsa-miR-550     | 5                      | 5                      | 10                     | 8                      | 3                      | 6                      |
| 493 | hsa-miR-550*    | 14                     | 11                     | 6                      | 6                      | 17                     | 10                     |
| 494 | hsa-miR-551a    | 4                      | 5                      | 10                     | 5                      | 6                      | 4                      |
| 495 | hsa-miR-551b    | 9                      | 8                      | 9                      | 11                     | 12                     | 7                      |
| 496 | hsa-miR-551b*   | 4                      | 4                      | 9                      | 18                     | 3                      | 4                      |
| 497 | hsa-miR-552     | 1                      | 1                      | 11                     | 5                      | 1                      | 1                      |
| 498 | hsa-miR-553     | 1                      | 1                      | 6                      | 4                      | 1                      | 3                      |
| 499 | hsa-miR-554     | 1                      | 1                      | 5                      | 6                      | 1                      | 2                      |
| 500 | hsa-miR-555     | 2                      | 1                      | 17                     | 3                      | 1                      | 3                      |
| 501 | hsa-miR-556-3p  | 1                      | 3                      | 6                      | 6                      | 1                      | 3                      |
| 502 | hsa-miR-556-5p  | 1                      | 1                      | 5                      | 4                      | 1                      | 3                      |
| 503 | hsa-miR-557     | 3                      | 5                      | 10                     | 4                      | 3                      | 4                      |
| 504 | hsa-miR-558     | 4                      | 3                      | 4                      | 6                      | 2                      | 3                      |

(Continued)

SUPPLEMENTARY TABLE 1. COMPLETE NORMALIZED INTENSITY VALUES FOR miRNAs ACROSS ALL SAMPLES (Continued)

| No. | Reporter name  | <i>iPSC-1</i>          | <i>iPSC-2</i>          | <i>Fibro-1</i>         | <i>Fibro-2</i>         | <i>hESC-1</i>          | <i>hESC-2</i>          |
|-----|----------------|------------------------|------------------------|------------------------|------------------------|------------------------|------------------------|
|     |                | <i>Averaged signal</i> |
| 505 | hsa-miR-559    | 3                      | 3                      | 10                     | 4                      | 2                      | 2                      |
| 506 | hsa-miR-561    | 1                      | 4                      | 4                      | 4                      | 1                      | 1                      |
| 507 | hsa-miR-562    | 2                      | 3                      | 4                      | 5                      | 9                      | 3                      |
| 508 | hsa-miR-563    | 3                      | 4                      | 10                     | 12                     | 3                      | 2                      |
| 509 | hsa-miR-564    | 5                      | 6                      | 14                     | 8                      | 3                      | 6                      |
| 510 | hsa-miR-566    | 3                      | 3                      | 4                      | 5                      | 1                      | 4                      |
| 511 | hsa-miR-567    | 2                      | 3                      | 3                      | 5                      | 1                      | 3                      |
| 512 | hsa-miR-568    | 2                      | 2                      | 8                      | 12                     | 1                      | 2                      |
| 513 | hsa-miR-569    | 2                      | 1                      | 8                      | 4                      | 1                      | 2                      |
| 514 | hsa-miR-570    | 1                      | 3                      | 3                      | 7                      | 1                      | 2                      |
| 515 | hsa-miR-571    | 1                      | 3                      | 5                      | 5                      | 2                      | 2                      |
| 516 | hsa-miR-572    | 4                      | 4                      | 9                      | 17                     | 5                      | 5                      |
| 517 | hsa-miR-573    | 2                      | 2                      | 8                      | 12                     | 3                      | 4                      |
| 518 | hsa-miR-574-3p | 88                     | 53                     | 285                    | 289                    | 16                     | 31                     |
| 519 | hsa-miR-574-5p | 348                    | 613                    | 658                    | 716                    | 27                     | 116                    |
| 520 | hsa-miR-575    | 21                     | 22                     | 10                     | 14                     | 8                      | 17                     |
| 521 | hsa-miR-576-3p | 3                      | 3                      | 10                     | 10                     | 4                      | 5                      |
| 522 | hsa-miR-576-5p | 3                      | 3                      | 7                      | 11                     | 2                      | 3                      |
| 523 | hsa-miR-577    | 3                      | 1                      | 4                      | 6                      | 3                      | 2                      |
| 524 | hsa-miR-578    | 4                      | 3                      | 8                      | 7                      | 2                      | 3                      |
| 525 | hsa-miR-579    | 2                      | 1                      | 7                      | 12                     | 3                      | 3                      |
| 526 | hsa-miR-580    | 2                      | 0                      | 8                      | 13                     | 2                      | 3                      |
| 527 | hsa-miR-581    | 1                      | 1                      | 7                      | 10                     | 3                      | 3                      |
| 528 | hsa-miR-582-3p | 1                      | 1                      | 12                     | 9                      | 3                      | 5                      |
| 529 | hsa-miR-582-5p | 1                      | 2                      | 10                     | 6                      | 3                      | 4                      |
| 530 | hsa-miR-583    | 1                      | 3                      | 9                      | 12                     | 3                      | 4                      |
| 531 | hsa-miR-584    | 5                      | 8                      | 52                     | 59                     | 5                      | 9                      |
| 532 | hsa-miR-585    | 2                      | 1                      | 9                      | 11                     | 3                      | 3                      |
| 533 | hsa-miR-586    | 1                      | 1                      | 7                      | 9                      | 4                      | 3                      |
| 534 | hsa-miR-587    | 3                      | 1                      | 13                     | 12                     | 3                      | 3                      |
| 535 | hsa-miR-588    | 3                      | 1                      | 9                      | 16                     | 2                      | 4                      |
| 536 | hsa-miR-589    | 4                      | 3                      | 10                     | 15                     | 4                      | 4                      |
| 537 | hsa-miR-589*   | 5                      | 4                      | 7                      | 10                     | 6                      | 5                      |
| 538 | hsa-miR-590-3p | 2                      | 1                      | 2                      | 10                     | 2                      | 3                      |
| 539 | hsa-miR-590-5p | 4                      | 5                      | 4                      | 12                     | 5                      | 5                      |
| 540 | hsa-miR-591    | 3                      | 1                      | 6                      | 11                     | 3                      | 3                      |
| 541 | hsa-miR-592    | 1                      | 1                      | 5                      | 10                     | 3                      | 4                      |
| 542 | hsa-miR-593    | 3                      | 1                      | 2                      | 12                     | 3                      | 5                      |
| 543 | hsa-miR-593*   | 3                      | 4                      | 6                      | 13                     | 3                      | 4                      |
| 544 | hsa-miR-595    | 1                      | 1                      | 1                      | 10                     | 2                      | 5                      |
| 545 | hsa-miR-596    | 3                      | 1                      | 12                     | 13                     | 3                      | 5                      |
| 546 | hsa-miR-597    | 1                      | 1                      | 5                      | 6                      | 3                      | 2                      |
| 547 | hsa-miR-598    | 38                     | 46                     | 13                     | 8                      | 3                      | 21                     |
| 548 | hsa-miR-599    | 2                      | 3                      | 5                      | 5                      | 2                      | 1                      |
| 549 | hsa-miR-600    | 2                      | 2                      | 8                      | 5                      | 2                      | 2                      |
| 550 | hsa-miR-601    | 7                      | 8                      | 9                      | 8                      | 2                      | 3                      |
| 551 | hsa-miR-602    | 6                      | 6                      | 12                     | 13                     | 8                      | 17                     |
| 552 | hsa-miR-603    | 4                      | 3                      | 7                      | 6                      | 1                      | 4                      |
| 553 | hsa-miR-604    | 3                      | 3                      | 8                      | 5                      | 2                      | 3                      |
| 554 | hsa-miR-605    | 5                      | 4                      | 13                     | 7                      | 4                      | 4                      |
| 555 | hsa-miR-606    | 4                      | 3                      | 8                      | 5                      | 1                      | 3                      |
| 556 | hsa-miR-607    | 2                      | 3                      | 7                      | 5                      | 1                      | 2                      |
| 557 | hsa-miR-608    | 5                      | 5                      | 8                      | 6                      | 2                      | 4                      |
| 558 | hsa-miR-609    | 2                      | 3                      | 11                     | 3                      | 1                      | 2                      |
| 559 | hsa-miR-610    | 3                      | 3                      | 7                      | 5                      | 0                      | 2                      |
| 560 | hsa-miR-611    | 4                      | 4                      | 13                     | 7                      | 1                      | 3                      |

SUPPLEMENTARY TABLE 1. COMPLETE NORMALIZED INTENSITY VALUES FOR miRNAs ACROSS ALL SAMPLES (Continued)

| No. | Reporter name  | <i>iPSC-1</i>          | <i>iPSC-2</i>          | <i>Fibro-1</i>         | <i>Fibro-2</i>         | <i>hESC-1</i>          | <i>hESC-2</i>          |
|-----|----------------|------------------------|------------------------|------------------------|------------------------|------------------------|------------------------|
|     |                | <i>Averaged signal</i> |
| 561 | hsa-miR-612    | 8                      | 14                     | 15                     | 7                      | 7                      | 23                     |
| 562 | hsa-miR-613    | 3                      | 3                      | 8                      | 4                      | 2                      | 1                      |
| 563 | hsa-miR-614    | 3                      | 2                      | 8                      | 4                      | 2                      | 4                      |
| 564 | hsa-miR-615-3p | 5                      | 3                      | 9                      | 8                      | 2                      | 6                      |
| 565 | hsa-miR-615-5p | 4                      | 2                      | 15                     | 9                      | 3                      | 4                      |
| 566 | hsa-miR-616    | 4                      | 4                      | 8                      | 5                      | 2                      | 4                      |
| 567 | hsa-miR-616*   | 3                      | 2                      | 7                      | 5                      | 1                      | 4                      |
| 568 | hsa-miR-617    | 4                      | 2                      | 7                      | 5                      | 2                      | 1                      |
| 569 | hsa-miR-618    | 4                      | 3                      | 4                      | 5                      | 1                      | 3                      |
| 570 | hsa-miR-619    | 3                      | 2                      | 4                      | 6                      | 1                      | 1                      |
| 571 | hsa-miR-620    | 3                      | 3                      | 9                      | 3                      | 0                      | 1                      |
| 572 | hsa-miR-621    | 3                      | 2                      | 12                     | 6                      | 0                      | 1                      |
| 573 | hsa-miR-622    | 4                      | 4                      | 9                      | 5                      | 2                      | 4                      |
| 574 | hsa-miR-623    | 5                      | 4                      | 11                     | 5                      | 1                      | 2                      |
| 575 | hsa-miR-624    | 2                      | 1                      | 7                      | 4                      | 0                      | 1                      |
| 576 | hsa-miR-624*   | 9                      | 10                     | 9                      | 8                      | 2                      | 8                      |
| 577 | hsa-miR-625    | 6                      | 9                      | 12                     | 7                      | 24                     | 16                     |
| 578 | hsa-miR-625*   | 19                     | 19                     | 11                     | 16                     | 7                      | 17                     |
| 579 | hsa-miR-626    | 3                      | 1                      | 9                      | 3                      | 2                      | 1                      |
| 580 | hsa-miR-627    | 5                      | 1                      | 12                     | 3                      | 2                      | 1                      |
| 581 | hsa-miR-628-3p | 6                      | 5                      | 9                      | 7                      | 4                      | 9                      |
| 582 | hsa-miR-628-5p | 4                      | 3                      | 6                      | 5                      | 2                      | 4                      |
| 583 | hsa-miR-629    | 39                     | 39                     | 32                     | 24                     | 72                     | 70                     |
| 584 | hsa-miR-629*   | 18                     | 11                     | 18                     | 10                     | 26                     | 28                     |
| 585 | hsa-miR-630    | 3                      | 1                      | 7                      | 10                     | 2                      | 3                      |
| 586 | hsa-miR-631    | 4                      | 1                      | 9                      | 5                      | 2                      | 2                      |
| 587 | hsa-miR-632    | 2                      | 0                      | 9                      | 3                      | 1                      | 2                      |
| 588 | hsa-miR-633    | 1                      | 1                      | 4                      | 3                      | 1                      | 1                      |
| 589 | hsa-miR-634    | 4                      | 1                      | 9                      | 9                      | 1                      | 1                      |
| 590 | hsa-miR-635    | 1                      | 1                      | 5                      | 6                      | 1                      | 1                      |
| 591 | hsa-miR-636    | 4                      | 5                      | 10                     | 7                      | 2                      | 2                      |
| 592 | hsa-miR-637    | 4                      | 5                      | 8                      | 10                     | 3                      | 7                      |
| 593 | hsa-miR-638    | 6,317                  | 5,927                  | 2,329                  | 1,695                  | 7,483                  | 7,778                  |
| 594 | hsa-miR-639    | 1                      | 1                      | 4                      | 7                      | 1                      | 3                      |
| 595 | hsa-miR-640    | 1                      | 2                      | 6                      | 10                     | 2                      | 4                      |
| 596 | hsa-miR-641    | 5                      | 5                      | 6                      | 11                     | 8                      | 7                      |
| 597 | hsa-miR-642    | 4                      | 1                      | 8                      | 5                      | 3                      | 3                      |
| 598 | hsa-miR-643    | 3                      | 3                      | 4                      | 12                     | 3                      | 3                      |
| 599 | hsa-miR-644    | 1                      | 2                      | 12                     | 9                      | 2                      | 4                      |
| 600 | hsa-miR-645    | 3                      | 1                      | 9                      | 13                     | 2                      | 2                      |
| 601 | hsa-miR-646    | 1                      | 2                      | 12                     | 13                     | 2                      | 3                      |
| 602 | hsa-miR-647    | 3                      | 3                      | 12                     | 11                     | 2                      | 4                      |
| 603 | hsa-miR-648    | 3                      | 1                      | 6                      | 12                     | 2                      | 2                      |
| 604 | hsa-miR-649    | 3                      | 1                      | 17                     | 11                     | 1                      | 4                      |
| 605 | hsa-miR-650    | 4                      | 3                      | 13                     | 12                     | 3                      | 3                      |
| 606 | hsa-miR-651    | 1                      | 1                      | 4                      | 10                     | 1                      | 3                      |
| 607 | hsa-miR-652    | 16                     | 16                     | 11                     | 12                     | 16                     | 25                     |
| 608 | hsa-miR-653    | 1                      | 1                      | 10                     | 9                      | 2                      | 3                      |
| 609 | hsa-miR-654-3p | 2                      | 1                      | 114                    | 144                    | 3                      | 2                      |
| 610 | hsa-miR-654-5p | 4                      | 8                      | 40                     | 38                     | 3                      | 7                      |
| 611 | hsa-miR-655    | 1                      | 1                      | 9                      | 6                      | 2                      | 1                      |
| 612 | hsa-miR-656    | 1                      | 0                      | 12                     | 14                     | 2                      | 2                      |
| 613 | hsa-miR-657    | 3                      | 0                      | 12                     | 15                     | 2                      | 3                      |
| 614 | hsa-miR-658    | 4                      | 5                      | 11                     | 5                      | 4                      | 8                      |
| 615 | hsa-miR-659    | 6                      | 3                      | 11                     | 12                     | 4                      | 5                      |
| 616 | hsa-miR-660    | 17                     | 12                     | 14                     | 10                     | 4                      | 12                     |

(Continued)



SUPPLEMENTARY TABLE 1. COMPLETE NORMALIZED INTENSITY VALUES FOR miRNAs ACROSS ALL SAMPLES (Continued)

| No. | Reporter name  | <i>iPSC-1</i>          | <i>iPSC-2</i>          | <i>Fibro-1</i>         | <i>Fibro-2</i>         | <i>hESC-1</i>          | <i>hESC-2</i>          |
|-----|----------------|------------------------|------------------------|------------------------|------------------------|------------------------|------------------------|
|     |                | <i>Averaged signal</i> |
| 617 | hsa-miR-661    | 1                      | 1                      | 4                      | 13                     | 2                      | 3                      |
| 618 | hsa-miR-662    | 1                      | 1                      | 8                      | 9                      | 3                      | 4                      |
| 619 | hsa-miR-663    | 1,183                  | 1,754                  | 390                    | 264                    | 1,915                  | 2,436                  |
| 620 | hsa-miR-665    | 3                      | 2                      | 6                      | 16                     | 2                      | 4                      |
| 621 | hsa-miR-668    | 3                      | 1                      | 21                     | 13                     | 2                      | 4                      |
| 622 | hsa-miR-671-3p | 2                      | 2                      | 18                     | 13                     | 4                      | 5                      |
| 623 | hsa-miR-671-5p | 44                     | 53                     | 52                     | 66                     | 40                     | 63                     |
| 624 | hsa-miR-675    | 4                      | 1                      | 10                     | 12                     | 2                      | 5                      |
| 625 | hsa-miR-7      | 101                    | 253                    | 67                     | 117                    | 82                     | 307                    |
| 626 | hsa-miR-708    | 92                     | 70                     | 155                    | 151                    | 613                    | 368                    |
| 627 | hsa-miR-708*   | 1                      | 1                      | 6                      | 5                      | 4                      | 4                      |
| 628 | hsa-miR-7-1*   | 42                     | 29                     | 21                     | 20                     | 18                     | 45                     |
| 629 | hsa-miR-7-2*   | 1                      | 0                      | 8                      | 11                     | 3                      | 2                      |
| 630 | hsa-miR-744    | 56                     | 70                     | 71                     | 59                     | 185                    | 108                    |
| 631 | hsa-miR-744*   | 3                      | 3                      | 12                     | 3                      | 2                      | 2                      |
| 632 | hsa-miR-758    | 1                      | 1                      | 38                     | 35                     | 2                      | 1                      |
| 633 | hsa-miR-760    | 6                      | 6                      | 11                     | 7                      | 10                     | 14                     |
| 634 | hsa-miR-765    | 26                     | 87                     | 14                     | 13                     | 13                     | 47                     |
| 635 | hsa-miR-766    | 11                     | 8                      | 19                     | 12                     | 23                     | 21                     |
| 636 | hsa-miR-767-3p | 1                      | 3                      | 7                      | 8                      | 2                      | 1                      |
| 637 | hsa-miR-767-5p | 6                      | 6                      | 6                      | 2                      | 3                      | 4                      |
| 638 | hsa-miR-768-3p | 49                     | 92                     | 110                    | 86                     | 37                     | 83                     |
| 639 | hsa-miR-768-5p | 90                     | 156                    | 190                    | 130                    | 56                     | 166                    |
| 640 | hsa-miR-769-3p | 6                      | 3                      | 7                      | 9                      | 6                      | 4                      |
| 641 | hsa-miR-769-5p | 9                      | 5                      | 12                     | 14                     | 30                     | 11                     |
| 642 | hsa-miR-770-5p | 4                      | 2                      | 6                      | 14                     | 2                      | 3                      |
| 643 | hsa-miR-802    | 2                      | 1                      | 1                      | 5                      | 2                      | 2                      |
| 644 | hsa-miR-873    | 4                      | 3                      | 57                     | 4                      | 1                      | 2                      |
| 645 | hsa-miR-874    | 8                      | 7                      | 14                     | 8                      | 2                      | 5                      |
| 646 | hsa-miR-875-3p | 4                      | 1                      | 9                      | 6                      | 1                      | 1                      |
| 647 | hsa-miR-875-5p | 1                      | 1                      | 1                      | 7                      | 1                      | 0                      |
| 648 | hsa-miR-876-3p | 3                      | 1                      | 2                      | 4                      | 1                      | 1                      |
| 649 | hsa-miR-876-5p | 1                      | 2                      | 8                      | 4                      | 2                      | 2                      |
| 650 | hsa-miR-877    | 176                    | 279                    | 97                     | 71                     | 196                    | 181                    |
| 651 | hsa-miR-885-3p | 3                      | 2                      | 6                      | 10                     | 2                      | 7                      |
| 652 | hsa-miR-885-5p | 5                      | 2                      | 13                     | 13                     | 2                      | 2                      |
| 653 | hsa-miR-886-3p | 5                      | 3                      | 14                     | 16                     | 2                      | 1                      |
| 654 | hsa-miR-886-5p | 152                    | 147                    | 145                    | 161                    | 3                      | 2                      |
| 655 | hsa-miR-887    | 6                      | 3                      | 11                     | 12                     | 1                      | 1                      |
| 656 | hsa-miR-888    | 4                      | 1                      | 8                      | 9                      | 3                      | 1                      |
| 657 | hsa-miR-888*   | 3                      | 0                      | 5                      | 8                      | 2                      | 1                      |
| 658 | hsa-miR-889    | 3                      | 1                      | 9                      | 16                     | 1                      | 0                      |
| 659 | hsa-miR-890    | 3                      | 1                      | 7                      | 7                      | 2                      | 1                      |
| 660 | hsa-miR-891a   | 4                      | 2                      | 10                     | 5                      | 1                      | 1                      |
| 661 | hsa-miR-891b   | 2                      | 1                      | 4                      | 5                      | 1                      | 1                      |
| 662 | hsa-miR-892a   | 2                      | 1                      | 4                      | 7                      | 1                      | 1                      |
| 663 | hsa-miR-892b   | 2                      | 1                      | 4                      | 7                      | 1                      | 2                      |
| 664 | hsa-miR-9      | 10                     | 18                     | 3                      | 6                      | 2                      | 7                      |
| 665 | hsa-miR-9*     | 7                      | 3                      | 5                      | 4                      | 2                      | 4                      |
| 666 | hsa-miR-920    | 3                      | 2                      | 4                      | 8                      | 1                      | 2                      |
| 667 | hsa-miR-921    | 1                      | 1                      | 5                      | 7                      | 2                      | 1                      |
| 668 | hsa-miR-922    | 1                      | 0                      | 4                      | 6                      | 1                      | 1                      |
| 669 | hsa-miR-923    | 2,427                  | 3,401                  | 659                    | 629                    | 1,781                  | 2,318                  |
| 670 | hsa-miR-924    | 2                      | 1                      | 6                      | 6                      | 3                      | 3                      |
| 671 | hsa-miR-92a    | 23,708                 | 20,276                 | 3,614                  | 3,345                  | 14,904                 | 15,160                 |
| 672 | hsa-miR-92a-1* | 79                     | 121                    | 8                      | 9                      | 40                     | 109                    |

SUPPLEMENTARY TABLE 1. COMPLETE NORMALIZED INTENSITY VALUES FOR miRNAs ACROSS ALL SAMPLES (Continued)

| No. | Reporter name  | <i>iPSC-1</i>          | <i>iPSC-2</i>          | <i>Fibro-1</i>         | <i>Fibro-2</i>         | <i>hESC-1</i>          | <i>hESC-2</i>          |
|-----|----------------|------------------------|------------------------|------------------------|------------------------|------------------------|------------------------|
|     |                | <i>Averaged signal</i> |
| 673 | hsa-miR-92a-2* | 47                     | 76                     | 10                     | 5                      | 55                     | 68                     |
| 674 | hsa-miR-92b    | 15,801                 | 17,368                 | 560                    | 625                    | 7,415                  | 9,948                  |
| 675 | hsa-miR-92b*   | 69                     | 91                     | 24                     | 13                     | 35                     | 51                     |
| 676 | hsa-miR-93     | 2,497                  | 2,276                  | 447                    | 432                    | 4,535                  | 2,906                  |
| 677 | hsa-miR-93*    | 13                     | 16                     | 17                     | 11                     | 16                     | 21                     |
| 678 | hsa-miR-933    | 6                      | 5                      | 18                     | 15                     | 8                      | 5                      |
| 679 | hsa-miR-934    | 1                      | 1                      | 6                      | 17                     | 1                      | 2                      |
| 680 | hsa-miR-935    | 3                      | 1                      | 13                     | 9                      | 1                      | 3                      |
| 681 | hsa-miR-936    | 12                     | 45                     | 17                     | 14                     | 18                     | 239                    |
| 682 | hsa-miR-937    | 2                      | 2                      | 13                     | 14                     | 3                      | 3                      |
| 683 | hsa-miR-938    | 0                      | 1                      | 8                      | 5                      | 2                      | 5                      |
| 684 | hsa-miR-939    | 30                     | 17                     | 15                     | 15                     | 4                      | 6                      |
| 685 | hsa-miR-940    | 14                     | 14                     | 49                     | 23                     | 28                     | 12                     |
| 686 | hsa-miR-941    | 2                      | 1                      | 12                     | 14                     | 2                      | 2                      |
| 687 | hsa-miR-942    | 1                      | 1                      | 9                      | 11                     | 1                      | 2                      |
| 688 | hsa-miR-943    | 2                      | 2                      | 8                      | 9                      | 2                      | 1                      |
| 689 | hsa-miR-944    | 1                      | 0                      | 6                      | 10                     | 1                      | 1                      |
| 690 | hsa-miR-95     | 3                      | 3                      | 4                      | 4                      | 1                      | 3                      |
| 691 | hsa-miR-96     | 4                      | 3                      | 5                      | 4                      | 59                     | 29                     |
| 692 | hsa-miR-96*    | 2                      | 1                      | 3                      | 11                     | 2                      | 3                      |
| 693 | hsa-miR-98     | 5                      | 0                      | 210                    | 238                    | 1                      | 1                      |
| 694 | hsa-miR-99a    | 13                     | 5                      | 1,192                  | 1,977                  | 3                      | 4                      |
| 695 | hsa-miR-99a*   | 1                      | 1                      | 6                      | 8                      | 1                      | 3                      |
| 696 | hsa-miR-99b    | 464                    | 309                    | 1,504                  | 1,250                  | 897                    | 535                    |
| 697 | hsa-miR-99b*   | 1                      | 1                      | 8                      | 12                     | 2                      | 2                      |
